# Supplementary figures and images for: Effects of sample size on plant single-cell RNA profiling
Source: Research Square preprint supplement (doi:10.21203/rs.3.rs-549533/v1), 2021-05-24

Figure S4

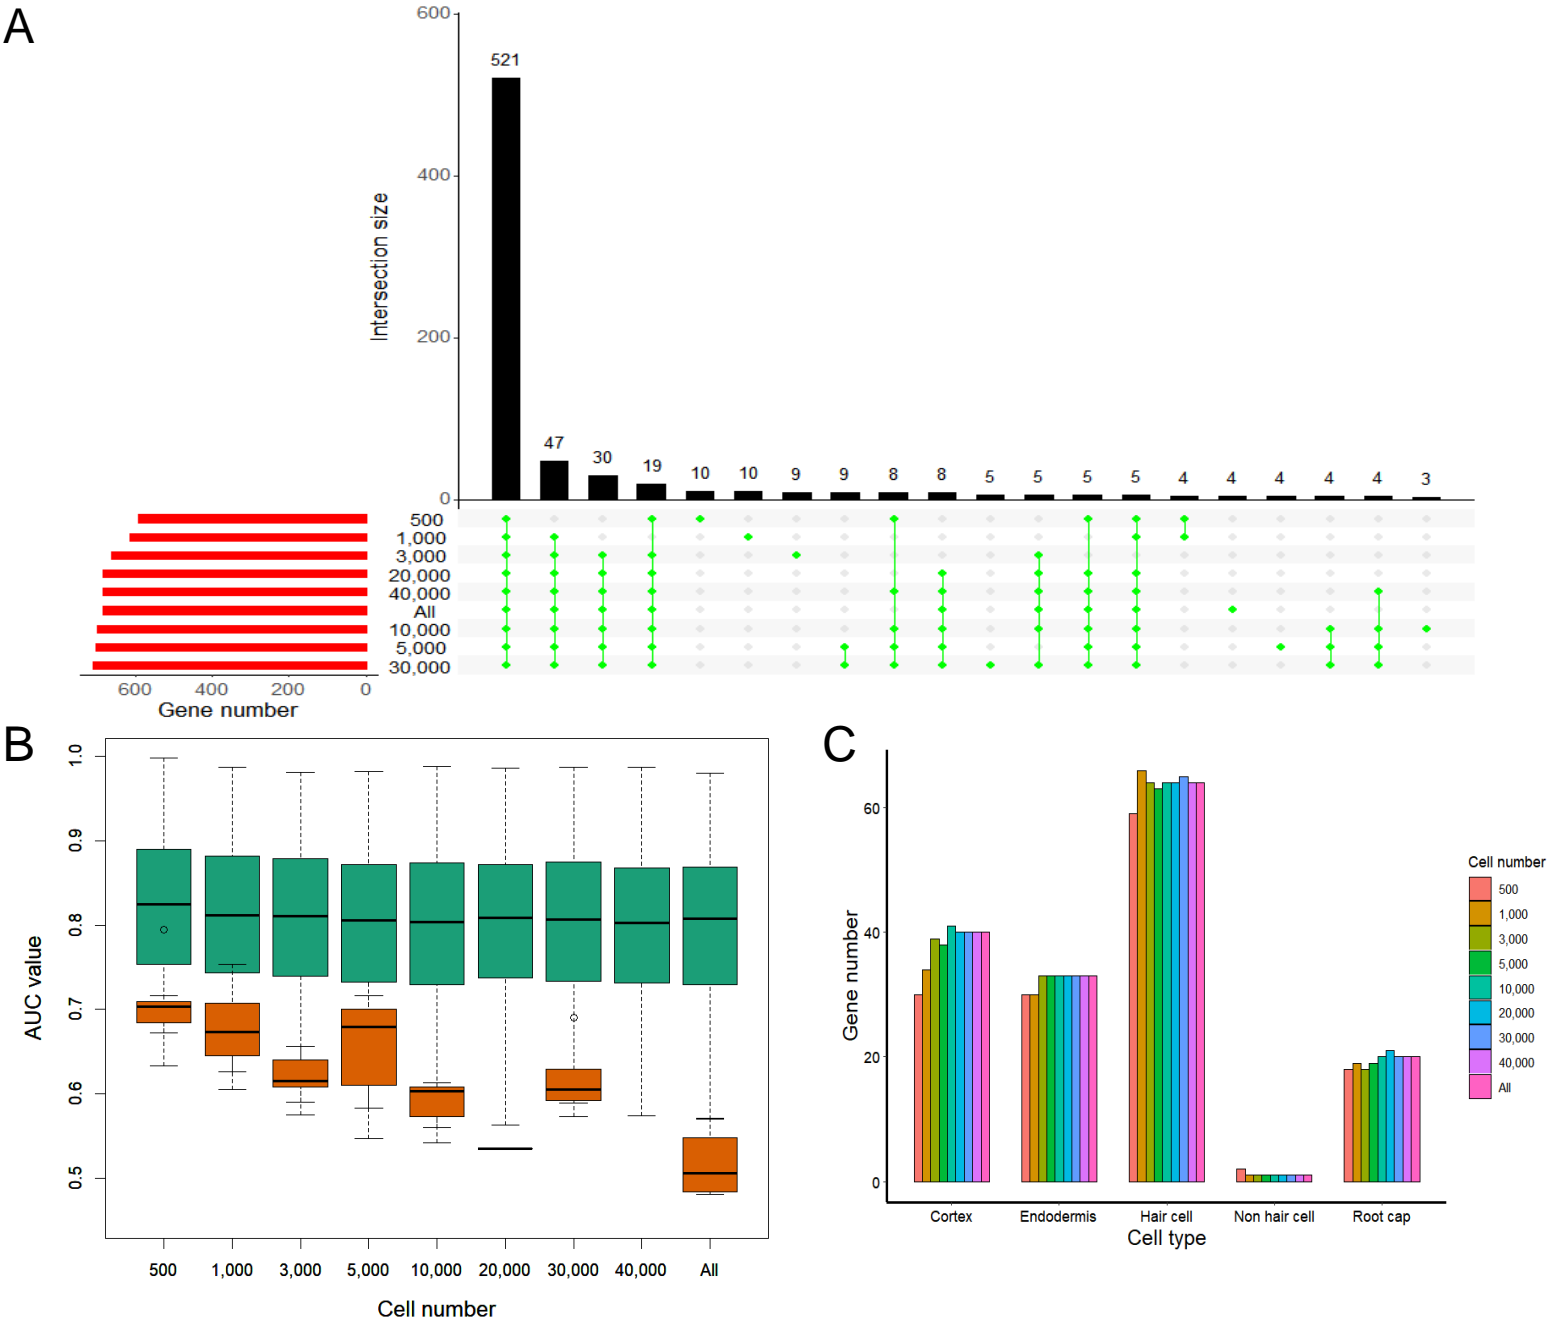

Supplement: Supplementary file 1 [file 385ad90493a7b093b928b85b.pdf]

Figure S1

A

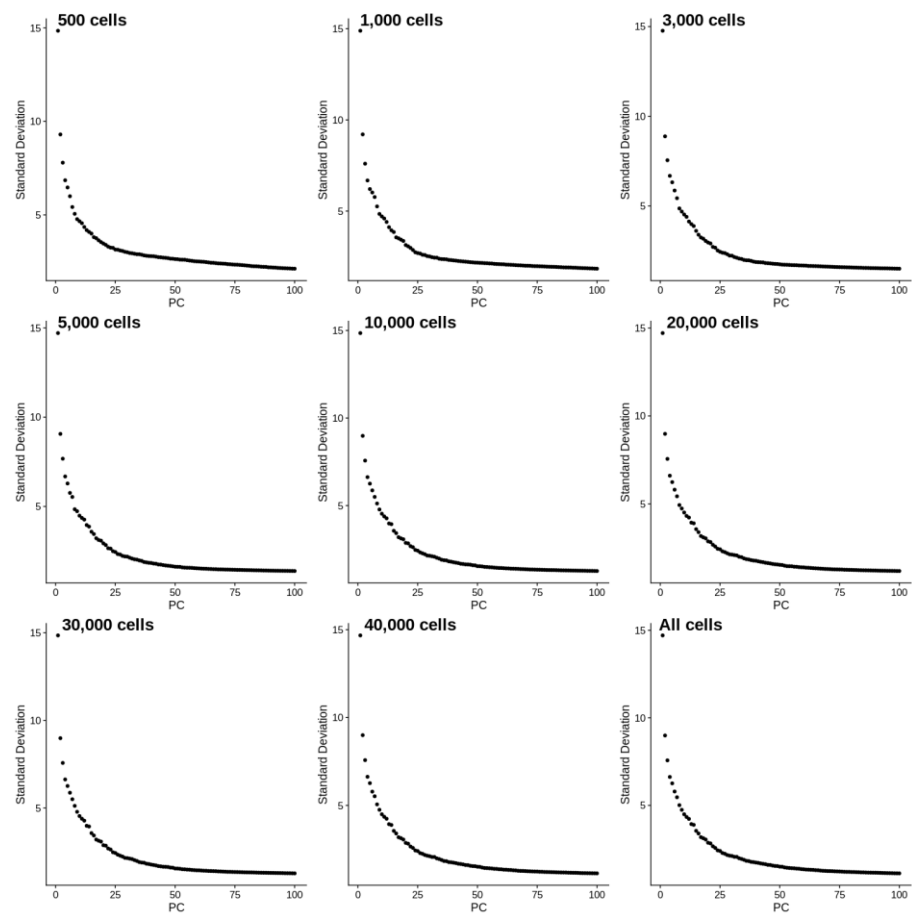

B

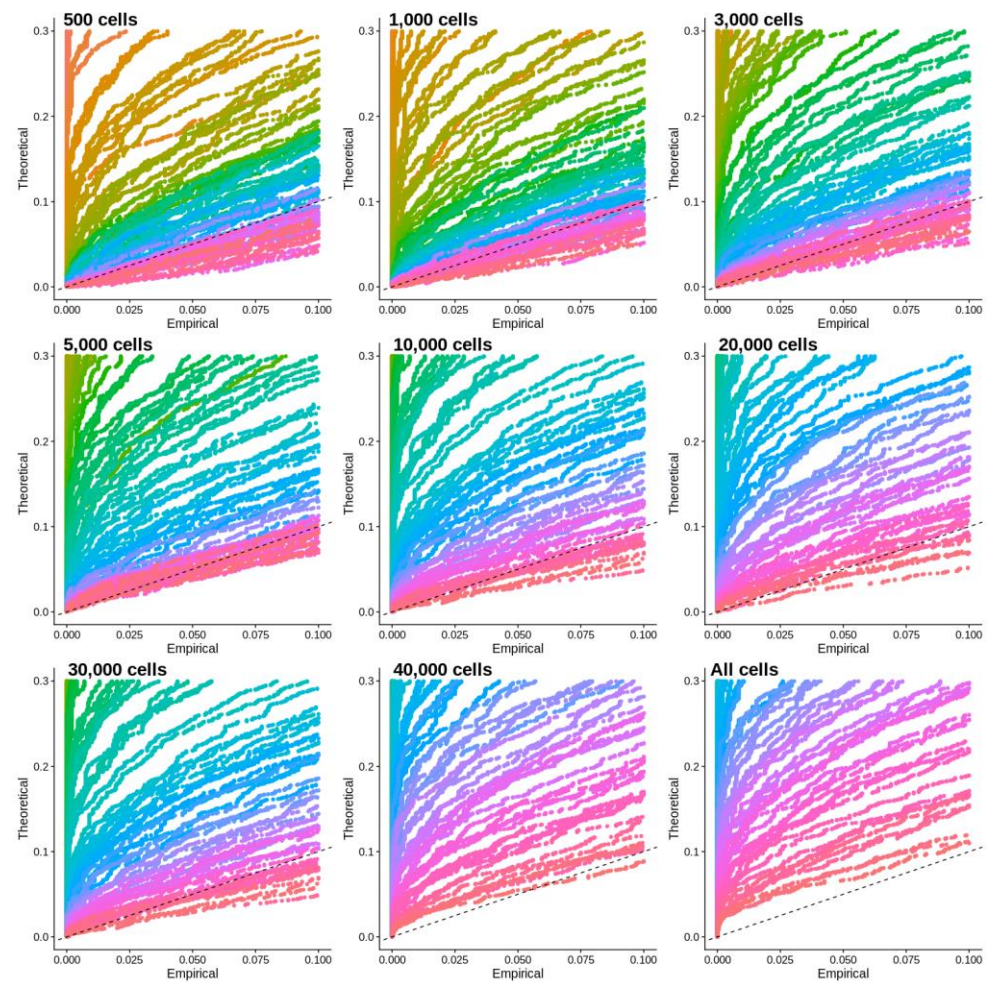

Supplement: Supplementary file 2 [file 44d9940c23f6f9fd46b5e430.pdf]

Figure S3

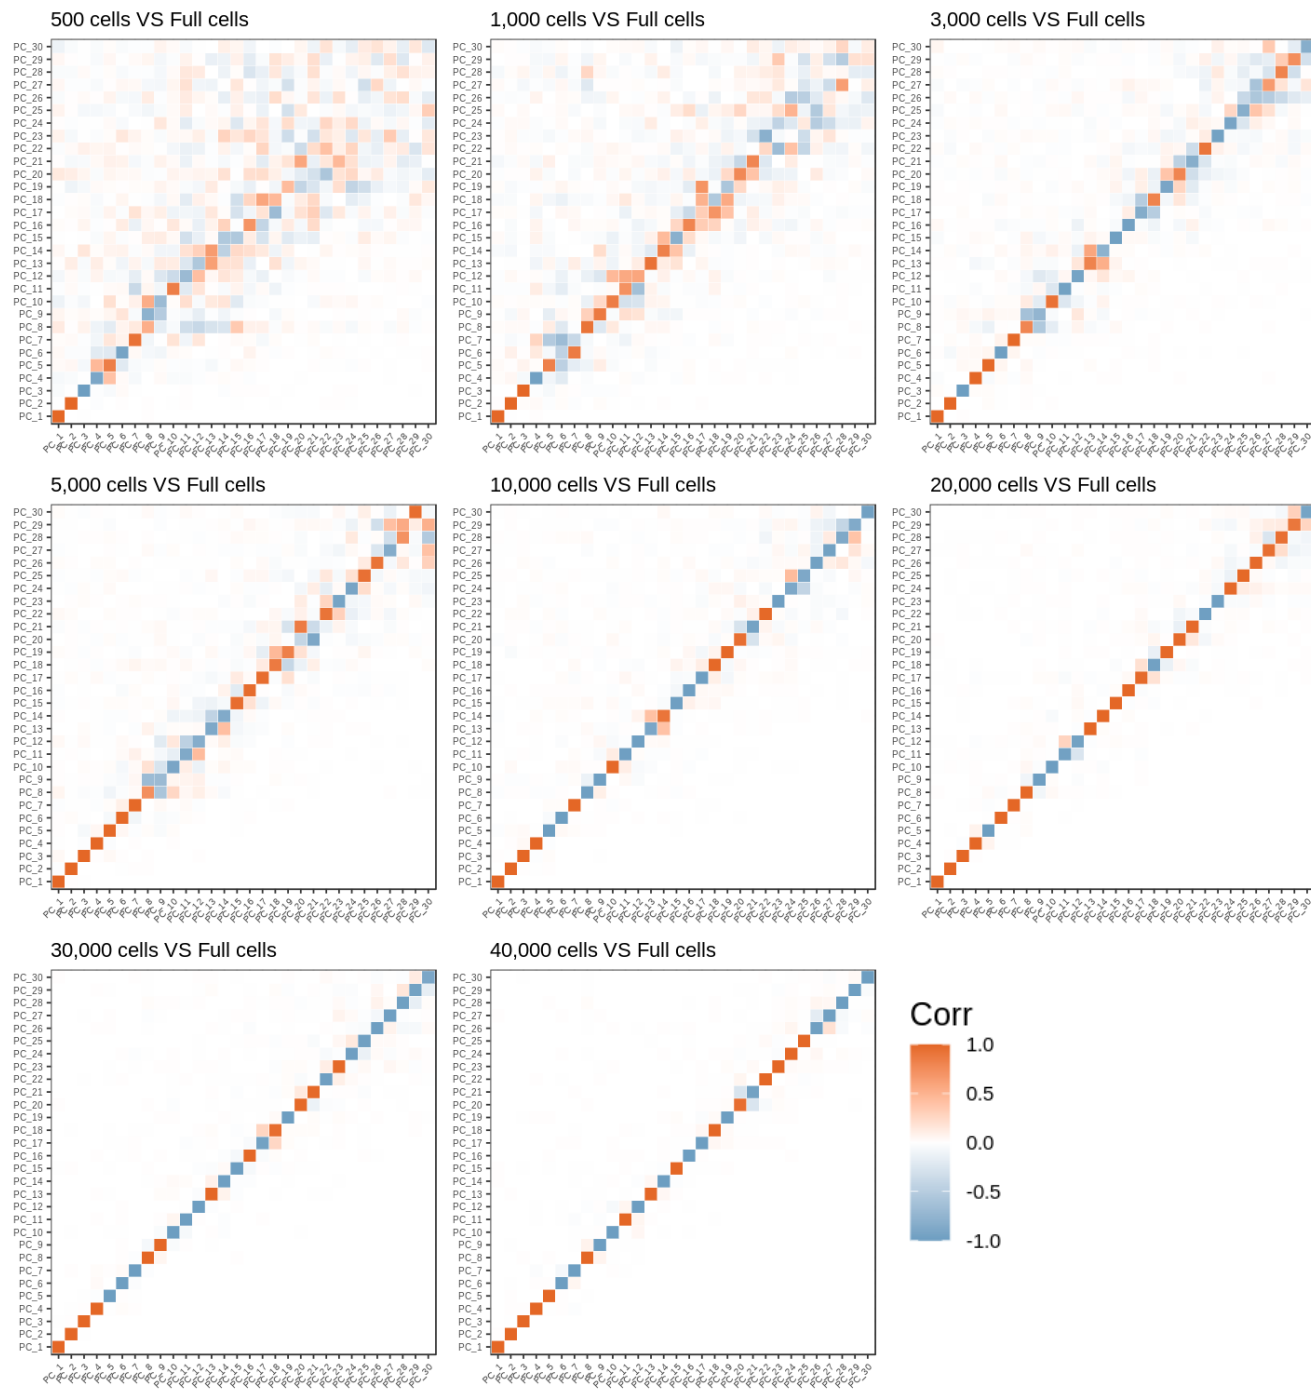

Supplement: Supplementary file 3 [file 833aaf0370c7c1d05c6bbc77.pdf]
